# Supplementary material
Source: PubMed Central journal article supplement (PMC5591748)

**Perkins et al 2016**

**Title:** Smith-Magenis syndrome patients often display antibody deficiency but not other immune pathologies

***Online Repository Materials:***Figures E1-E3

**Figure E1:** A detailed account of the reactivities of SMS sera versus control sera to 337 antigens

**Figure E2:** Persistent verrucous disease of the hand (A) and foot (B) of SMSY4

**Figure E3:** Bivariate analysis of serum reactivity to tetanus toxoid by conventional laboratory testing versus antigen microarray reveals fair concordance

Tables E1-E4

**Table E1-** Location, size and relevant genes contained within the deleted regions of 25 SMS blood donors

**Table E2:** History of autoimmune diseases in 76 SMS subjects (ages 6 months-37 years)

**Table E3:** Atopic history in 76 SMS subjects (ages 6 months-37 years)

**Table E4:** Relative frequencies of lymphocyte subsets in the peripheral blood of 19 SMS subjects

**Figure Legends**

**Figure E1:** A detailed account of the reactivities of SMS sera versus control sera to 337 antigens. A heat map displays reactivities of sera from 18 SMS subjects 14 healthy unrelated and 3 related controls to the 337 listed antigens. Colorimetric differences on the heat map correspond.

**Figure E2:** Persistent verrucous disease of the hand (A) and foot (B) of SMSY4

**Figure E3:** Bivariate analysis of serum reactivity to tetanus toxoid by conventional laboratory testing versus antigen microarray reveals fair concordance. Linearity ( $R^2$ ) and statistical significance ( $P$ ) calculated via linear regression analysis. MFI, mean fluorescence intensity.

**Table E1-** Location, size and relevant genes contained within the deleted regions of 25 SMS blood donors

|       | deleted element      |        | deleted element encompasses: |               |             |                  |
|-------|----------------------|--------|------------------------------|---------------|-------------|------------------|
|       | location             | size   | <i>RAI1</i>                  | <i>TOM1L2</i> | <i>FLCN</i> | <i>TNFRSF13B</i> |
| SMS1  | 17p11.2 <sup>a</sup> | 1.5 Mb | Y                            | Y             | Y           | Y                |
| SMS2  | 17p11.2 <sup>b</sup> | 3.6 Mb | Y                            | Y             | Y           | Y                |
| SMSY2 | 17p11.2 <sup>b</sup> | 3.7 Mb | Y                            | Y             | Y           | Y                |
| SMS4  | 17p11.2 <sup>a</sup> | 3.4 Mb | Y                            | Y             | Y           | Y                |
| SMS5  | 17p11.2 <sup>b</sup> | 6.3 Mb | Y                            | Y             | Y           | Y                |
| SMSY6 | 17p11.2 <sup>a</sup> | 3.4 Mb | Y                            | Y             | Y           | Y                |
| SMS7  | 17p11.2 <sup>a</sup> | 1.5Mb  | Y                            | Y             | Y           | Y                |
| SMS8  | 17p11.2 <sup>a</sup> | 3.1 Mb | Y                            | Y             | Y           | Y                |
| SMS9  | 17p11.2 <sup>b</sup> | 1.2 Mb | Y                            | Y             | Y           | Y                |
| SMSY3 | 17p11.2 <sup>b</sup> | 3.7 Mb | Y                            | Y             | Y           | Y                |
| SMS10 | 17p11.2 <sup>b</sup> | 3.4 Mb | Y                            | Y             | Y           | Y                |
| SMS11 | 17p11.2 <sup>a</sup> | 6.4 Mb | Y                            | Y             | Y           | Y                |
| SMS12 | 17p11.2 <sup>a</sup> | 3.7 Mb | Y                            | Y             | Y           | Y                |
| SMS13 | 17p11.2 <sup>b</sup> | 3.6 Mb | Y                            | Y             | Y           | Y                |
| SMS14 | 17p11.2 <sup>a</sup> | 3.6 Mb | Y                            | Y             | Y           | Y                |
| SMSY5 | 17p11.2 <sup>a</sup> | 6.3 Mb | Y                            | Y             | Y           | Y                |
| SMSY7 | 17p11.2 <sup>a</sup> | 3.3 Mb | Y                            | Y             | Y           | Y                |
| SMS17 | 17p11.2 <sup>a</sup> | 3.6 Mb | Y                            | Y             | Y           | Y                |
| SMS18 | 17p11.2 <sup>a</sup> | 3.2 Mb | Y                            | Y             | Y           | Y                |
| SMS19 | 17p11.2 <sup>a</sup> | 3.4 Mb | Y                            | Y             | Y           | Y                |
| SMS20 | 17p11.2 <sup>a</sup> | 3.7 Mb | Y                            | Y             | Y           | Y                |
| SMS21 | 17p11.2 <sup>a</sup> | 3.4 Mb | Y                            | Y             | Y           | Y                |
| SMS22 | 17p11.2 <sup>a</sup> | 2.1 Mb | Y                            | Y             | Y           | Y                |
| SMSY4 | 17p11.2 <sup>a</sup> | 3.5 Mb | Y                            | Y             | Y           | Y                |
| SMS23 | 17p11.2 <sup>a</sup> | 3.5 Mb | Y                            | Y             | Y           | Y                |

Y, Yes, the indicated gene is deleted

<sup>a</sup> Determined by FISH<sup>b</sup> Determined by microarray

**Table E2-** History of autoimmune diseases in 76 SMS subjects (ages 6 months-37 years)

|                        | Percentage (n) |
|------------------------|----------------|
| Autoimmune thyroiditis | 2.6 (2)        |
| Autoimmune neutropenia | 1.3 (1)        |
| Pernicious anemia      | 1.3 (1)        |

**Table E3-** Atopic history in 76 SMS subjects  
(ages 6 months-37 years)

|                   | Percentage (n) |
|-------------------|----------------|
| Allergic Rhinitis | 15.8 (12)      |
| Atopic Dermatitis | 9.2 (7)        |
| Food Allergy      | 6.6 (5)        |
| Asthma            | 7.9 (6)        |
| Drug Allergy      | 2.6 (2)        |

**Table E4-** Relative frequencies of lymphocyte subsets in the peripheral blood of 19 SMS subjects

| Reference | Age <sup>a</sup> | Sex | CD3 <sup>+</sup><br>(% PBLs) | CD3 <sup>+</sup> CD4 <sup>+</sup><br>(% PBLs) | CD3 <sup>+</sup> CD8 <sup>+</sup><br>(% PBLs) | CD3 <sup>+</sup> CD4 <sup>+</sup> CD25 <sup>hi</sup><br>FOXP3 <sup>+</sup> CD127 <sup>-</sup><br>(% CD4 <sup>+</sup> T cells) | CD19 <sup>+</sup><br>(% PBLs) | CD19 <sup>+</sup> CD27 <sup>+</sup><br>(% B cells) | CD19 <sup>+</sup> CD27 <sup>+</sup><br>IgM <sup>+</sup><br>(% B cells) | CD3 <sup>+</sup><br>CD16 <sup>+</sup> CD56 <sup>+</sup><br>(% PBLs) |
|-----------|------------------|-----|------------------------------|-----------------------------------------------|-----------------------------------------------|-------------------------------------------------------------------------------------------------------------------------------|-------------------------------|----------------------------------------------------|------------------------------------------------------------------------|---------------------------------------------------------------------|
|           |                  |     | <sub>-b</sub>                | <sub>-b</sub>                                 | <sub>-b</sub>                                 | <sub>-b</sub>                                                                                                                 | <sub>-b</sub>                 | <sub>-b</sub>                                      | <sub>-b</sub>                                                          | <sub>-b</sub>                                                       |
| SMS2      | 6                | M   | 33.5 (L)                     | 14.4 (L)                                      | 18.9                                          | 4.6                                                                                                                           | 41.8 (H)                      | 13.6                                               | 1.2 (L)                                                                | 3.4 (L)                                                             |
| SMS4      | 7                | M   | 56.7                         | 38.3                                          | 15.6                                          | 2.7 (L)                                                                                                                       | 15.5                          | 23.9                                               | 2.5 (L)                                                                | 19.1                                                                |
| SMS7      | 10               | M   | 68.4                         | 28.7                                          | 18.0                                          | 5.5                                                                                                                           | 19.5                          | 11.8 (L)                                           | 1.7 (L)                                                                | 4.7                                                                 |
| SMS8      | 10               | F   | 48.0                         | 29.4                                          | 17.4                                          | 5.4                                                                                                                           | 36.1 (H)                      | 41.2 (H)                                           | 12.0                                                                   | 11.1                                                                |
| SMS9      | 11               | M   | 63.4                         | 31.1                                          | 25.4                                          | 5.9                                                                                                                           | 18.6                          | 16.3                                               | 3.9 (L)                                                                | 8.1                                                                 |
| SMS10     | 13               | F   | 68.6                         | 28.6                                          | 28.0                                          | ND                                                                                                                            | 30.5 (H)                      | 9.5 (L)                                            | 2.8 (L)                                                                | 6.2                                                                 |
| SMS11     | 15               | F   | 54.1                         | 35.9                                          | 14.7                                          | 4.1                                                                                                                           | 48.0 (H)                      | 22.8                                               | 4.9 (L)                                                                | 3.6                                                                 |
| SMS12     | 16               | F   | 61.0                         | 37.5                                          | 19.1                                          | 4.9                                                                                                                           | 26.7                          | 20.1                                               | 4.1 (L)                                                                | 4.7                                                                 |
| SMS13     | 16               | M   | 58.9                         | 34.2                                          | 21.9                                          | 4.5                                                                                                                           | 26.2                          | 29.3                                               | 3.5 (L)                                                                | 8.2                                                                 |
| SMS14     | 20               | F   | 63.4                         | 38.8                                          | 23.0                                          | 5.7                                                                                                                           | 25.3                          | 27.6                                               | 7.6 (L)                                                                | 5.2                                                                 |
| SMSY5     | 20               | F   | 56.8                         | 22.2                                          | 32.1                                          | 6.5 <sup>c</sup>                                                                                                              | 20.1                          | 11.8 (L)                                           | 1.7 (L) <sup>c</sup>                                                   | 15.7                                                                |
| SMSY7     | 20               | F   | 52.2                         | 36.5                                          | 14.9                                          | 4.0 <sup>c</sup>                                                                                                              | 31.6 (H)                      | 20.6                                               | 3.5 (L) <sup>c</sup>                                                   | 9.4                                                                 |
| SMS17     | 20               | F   | 57.1                         | 33.8                                          | 16.8                                          | 4.5                                                                                                                           | 33.0 (H)                      | 21.6                                               | 3.3 (L)                                                                | 5.3                                                                 |
| SMS18     | 21               | F   | 67.9                         | 45.1                                          | 19.1                                          | 5.4                                                                                                                           | 7.8                           | 5.1 (L)                                            | 2.6 (L)                                                                | 9.7                                                                 |
| SMS19     | 22               | M   | 69.9                         | 50.3                                          | 18.7                                          | 4                                                                                                                             | 9.2                           | 20.2                                               | 7.0 (L)                                                                | 3.7                                                                 |
| SMS20     | 22               | F   | 65.9                         | 37.4                                          | 25.9                                          | 4.1                                                                                                                           | 21.5                          | 22.6                                               | 4.9 (L)                                                                | 8.6                                                                 |
| SMS21     | 23               | M   | 48.2                         | 22.8                                          | 22.1                                          | 8.6                                                                                                                           | 39.7 (H)                      | 18.1                                               | 3.8 (L)                                                                | 11.6                                                                |
| SMSY4     | 26               | F   | 58.9                         | 33.4                                          | 19.6                                          | 5.4 <sup>c</sup>                                                                                                              | 20.6                          | 22.5                                               | 12.1 <sup>c</sup>                                                      | 5.7                                                                 |
| SMS23     | 27               | M   | 51.1                         | 30.1                                          | 19.4                                          | 4.8                                                                                                                           | 32.7 (H)                      | 24.3                                               | 6.5 (L)                                                                | 12.8                                                                |

F, female; H, higher than normal range; L, below normal range; M, male; ND, not done; PBL, peripheral blood lymphocyte

<sup>a</sup> Age (years) at time of testing

<sup>b</sup> Institutional reference ranges vary by age

<sup>c</sup> Value previously published<sup>3</sup>



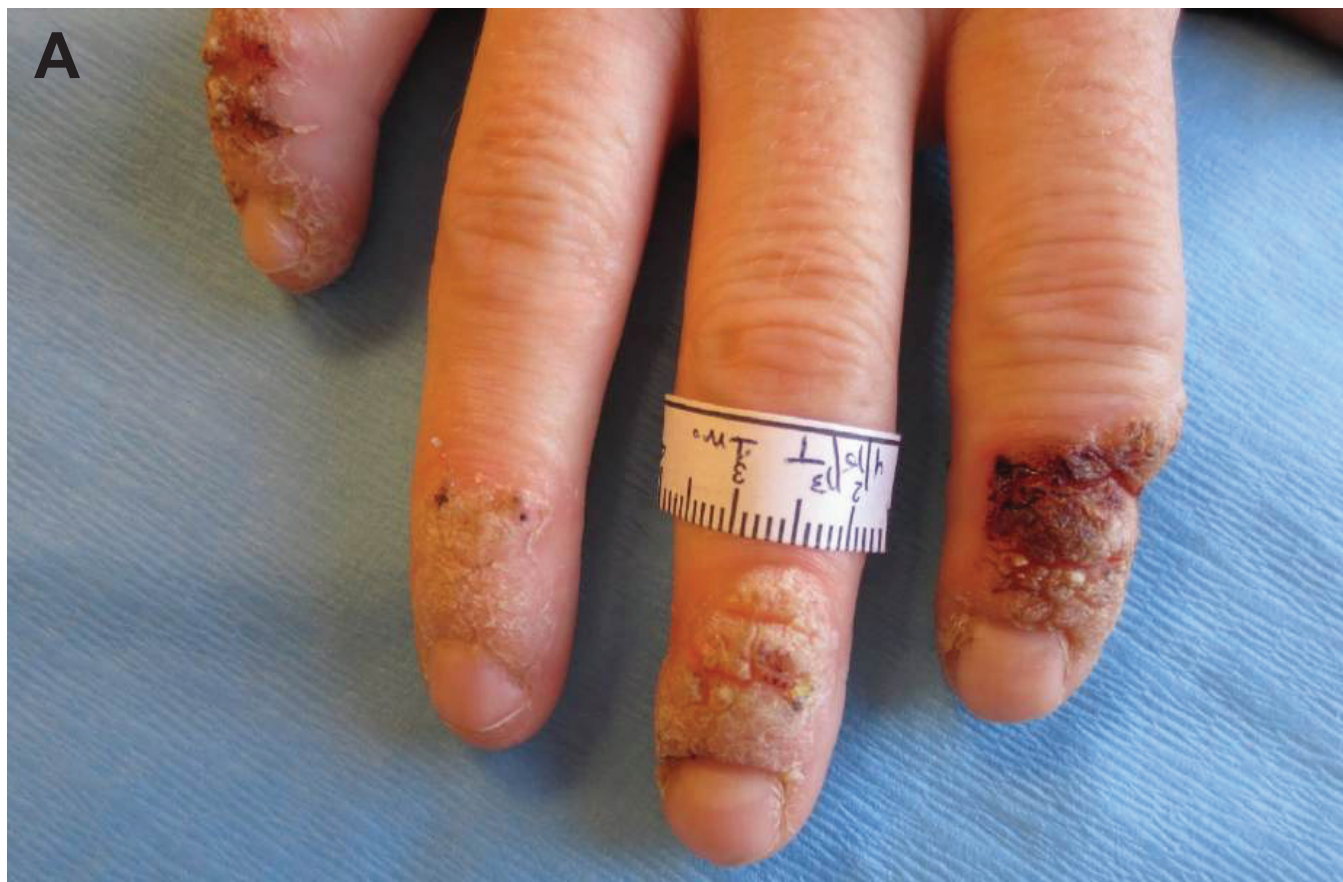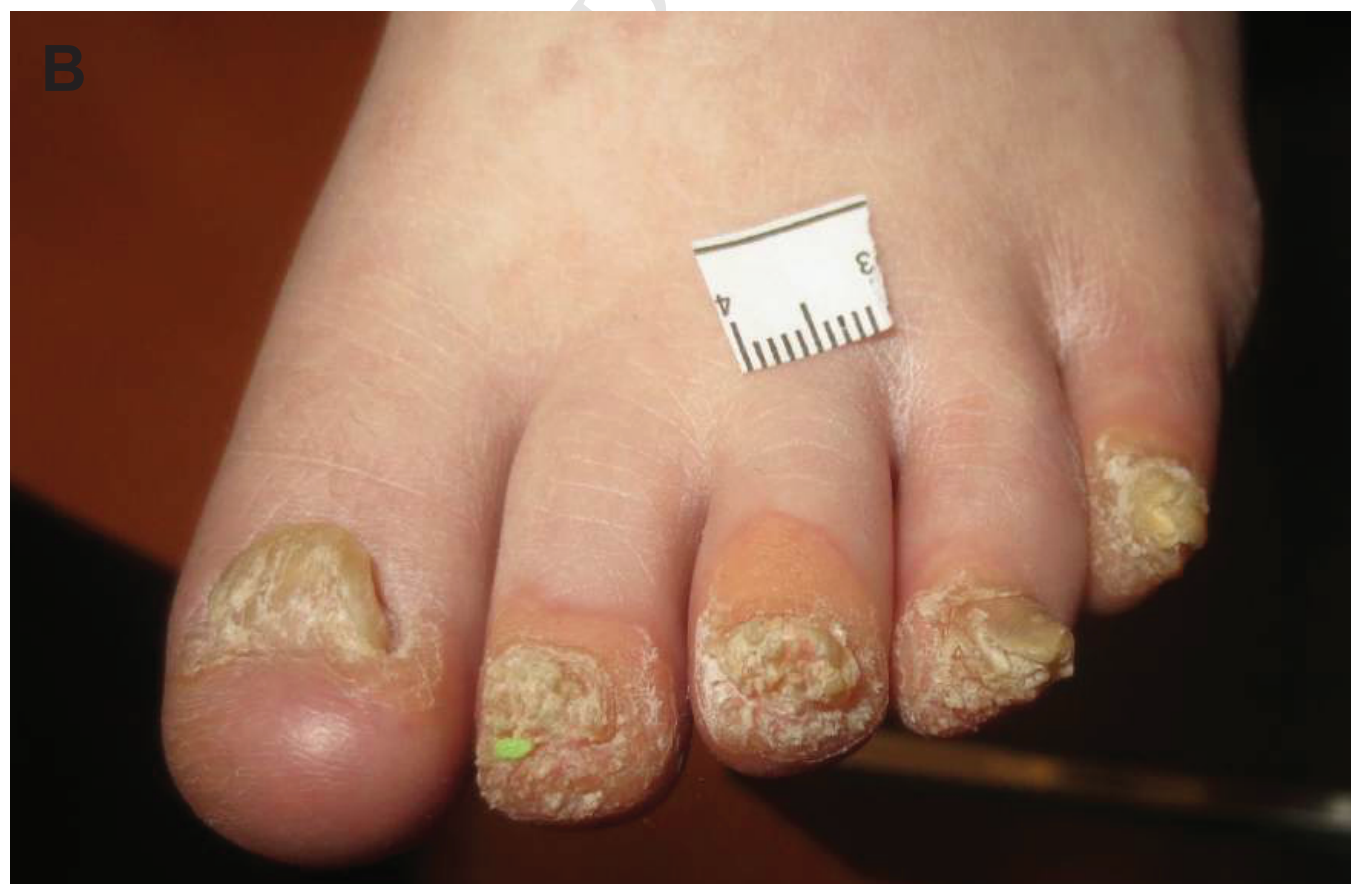



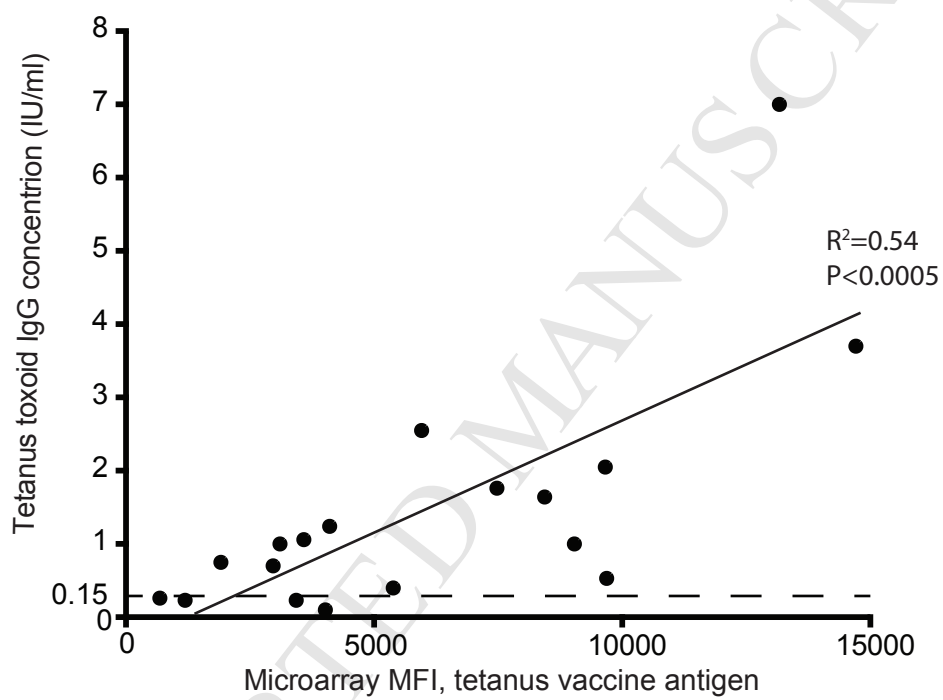

Supplement: NIHMS851175-supplement-supplement_1.pdf [file NIHMS851175-supplement-supplement_1.pdf]
